# Supplementary material for: A Comparison of Cats (Felis silvestris catus) Housed in Groups and Single Cages at a Shelter: A Retrospective Matched Cohort Study
Source: MDPI journal article supplement (doi:10.3390/ani8020029), 2018-02-14
Supplement: s1 [file s1]

Article

# A Comparison of Cats (*Felis silvestris catus*) Housed in Groups and Single Cages at a Shelter: A Retrospective Matched Cohort Study

Malini Suchak \* and Jacalyn Lamica

**Table S1.** Spearman’s rank correlations between dependent variables. Note that only cats who were released live could be returned, therefore the correlation between those two variables is not present. Significant correlations are in bold. \*\*\*denotes  $p < 0.001$ , \*\*  $p < 0.01$ , \* $p < 0.05$

|                        | Time on adoption floor | Moves to isolation | Moves           | Average days/location | Bite cases | Offsite moves  | Live release | Return |
|------------------------|------------------------|--------------------|-----------------|-----------------------|------------|----------------|--------------|--------|
| LoS                    | <b>-0.28***</b>        | <b>0.33***</b>     | <b>0.66***</b>  | <b>0.60***</b>        | 0.10       | <b>0.37***</b> | -0.11        | 0.06   |
| Time on adoption floor |                        | <b>-0.43**</b>     | <b>-0.45***</b> | 0.06                  | -0.10*     | -0.09          | 0.04         | 0.05   |
| Moves to Isolation     |                        |                    | <b>0.51***</b>  | <b>-0.141*</b>        | -0.05      | <b>0.21**</b>  | -0.02        | 0.02   |
| Moves                  |                        |                    |                 | -0.14                 | 0.09       | <b>0.56***</b> | -0.04        | 0.09   |
| Average days/location  |                        |                    |                 |                       | 0.02       | -0.04          | -0.09        | -0.03  |
| Bite cases             |                        |                    |                 |                       |            | -0.05          | -0.09        | -0.14  |
| Offsite moves          |                        |                    |                 |                       |            |                | -0.07        | 0.01   |
